# Supplementary material for: Salvage Autologous Stem Cell Transplantation in Daratumumab-Refractory Multiple Myeloma
Source: MDPI journal article supplement (doi:10.3390/cancers13164019), 2021-08-10
Supplement: s1 [file s1]

## Supplemental Figure S1

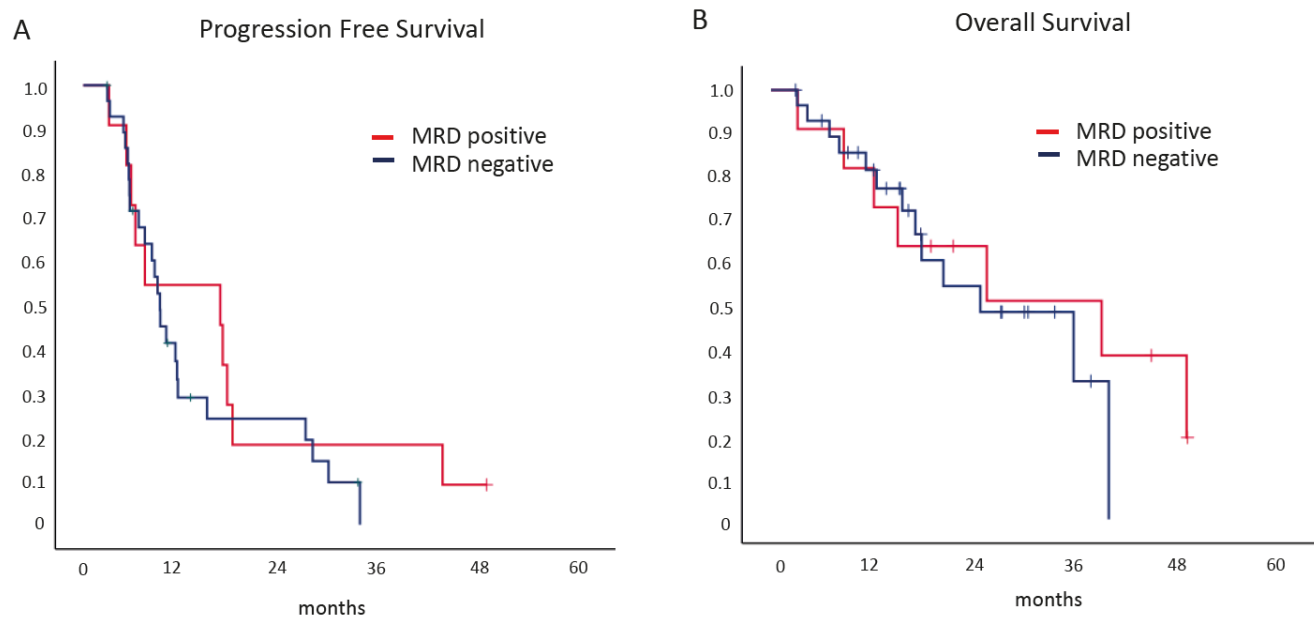

**Supplemental Figure S1.** shows PFS (A) and OS (B) for patients with at least a VGPR who are MRD positive or negative at one cell in  $10^5$ . There was no significant difference.
